# Supplementary material for: Bioactive composition of Reevesia formosana root and stem with cytotoxic activity potential
Source: Royal Society of Chemistry journal article supplement (doi:10.1039/c7ra04255h), 2017-01-01
Supplement: c7ra04255h1.pdf [file c7ra04255h1.pdf]

## Bioactive Composition of *Reevesia formosana* Root and Stem with Cytotoxic Activity Potential

Hsun-Shuo Chang, Chu-Hung Lin, Pei-Yu Hsiao, Hung-Ti Peng, Shiow-Ju Lee, Ming-Jen Cheng, Ih-Sheng Chen\*

**Figure S1.**  $^1\text{H}$  NMR spectrum of reevesiacoumarin (**1**) in acetone- $d_6$  at 400 MHz

**Figure S2.**  $^{13}\text{C}$  NMR spectrum of reevesiacoumarin (**1**) in acetone- $d_6$  at 100 MHz

**Figure S3.** DEPT spectrum of reevesiacoumarin (**1**) in acetone- $d_6$  at 100 MHz

**Figure S4.** COSY spectrum of reevesiacoumarin (**1**) in acetone- $d_6$

**Figure S5.** HSQC spectrum of reevesiacoumarin (**1**) in acetone- $d_6$

**Figure S6.** HMBC spectrum of reevesiacoumarin (**1**) in acetone- $d_6$

**Figure S7.** NOESY spectrum of reevesiacoumarin (**1**) in acetone- $d_6$

**Figure S8.**  $^1\text{H}$  NMR spectrum of reevesic acid (**2**) in  $\text{CD}_3\text{OD}$  at 600 MHz

**Figure S9.**  $^{13}\text{C}$  NMR spectrum of reevesic acid (**2**) in  $\text{CD}_3\text{OD}$  at 150 MHz

**Figure S10.** DEPT spectrum of reevesic acid (**2**) in  $\text{CD}_3\text{OD}$  at 150 MHz

**Figure S11.** COSY spectrum of reevesic acid (**2**) in  $\text{CD}_3\text{OD}$

**Figure S12.** HSQC spectrum of reevesic acid (**2**) in  $\text{CD}_3\text{OD}$

**Figure S13.** HMBC spectrum of reevesic acid (**2**) in  $\text{CD}_3\text{OD}$

**Figure S14.** NOESY spectrum of reevesic acid (**2**) in  $\text{CD}_3\text{OD}$

**Figure S15.**  $^1\text{H}$  NMR spectrum of reevesilignan (**3**) in  $\text{CD}_3\text{OD}$  at 600 MHz

**Figure S16.**  $^{13}\text{C}$  NMR spectrum of reevesilignan (**3**) in  $\text{CD}_3\text{OD}$  at 150 MHz

**Figure S17.** DEPT spectrum of reevesilignan (**3**) in  $\text{CD}_3\text{OD}$  at 150 MHz

**Figure S18.** COSY spectrum of reevesilignan (**3**) in  $\text{CD}_3\text{OD}$

**Figure S19.** HSQC spectrum of reevesilignan (**3**) in  $\text{CD}_3\text{OD}$

**Figure S20.** HMBC spectrum of reevesilignan (**3**) in  $\text{CD}_3\text{OD}$

**Figure S21.** NOESY spectrum of reevesilignan (**3**) in CD<sub>3</sub>OD

**Figure S22.** <sup>1</sup>H NMR spectrum of reevesiterpenol A (**4**) in CDCl<sub>3</sub> at 400 MHz

**Figure S23.** <sup>13</sup>C NMR spectrum of reevesiterpenol A (**4**) in CDCl<sub>3</sub> at 100 MHz

**Figure S24.** DEPT spectrum of reevesiterpenol A (**4**) in CDCl<sub>3</sub> at 100 MHz

**Figure S25.** COSY spectrum of reevesiterpenol A (**4**) in CDCl<sub>3</sub>

**Figure S26.** HSQC spectrum of reevesiterpenol A (**4**) in CDCl<sub>3</sub>

**Figure S27.** HMBC spectrum of reevesiterpenol A (**4**) in CDCl<sub>3</sub>

**Figure S28.** NOESY spectrum of reevesiterpenol A (**4**) in CDCl<sub>3</sub>

**Figure S29.** <sup>1</sup>H NMR spectrum of reevesiterpenol B (**5**) in CDCl<sub>3</sub> at 400 MHz

**Figure S30.** <sup>13</sup>C NMR spectrum of reevesiterpenol B (**5**) in CDCl<sub>3</sub> at 100 MHz

**Figure S31.** DEPT spectrum of reevesiterpenol B (**5**) in CDCl<sub>3</sub> at 100 MHz

**Figure S32.** COSY spectrum of reevesiterpenol B (**5**) in CDCl<sub>3</sub>

**Figure S33.** HSQC spectrum of reevesiterpenol B (**5**) in CDCl<sub>3</sub>

**Figure S34.** HMBC spectrum of reevesiterpenol B (**5**) in CDCl<sub>3</sub>

**Figure S35.** NOESY spectrum of reevesiterpenol B (**5**) in CDCl<sub>3</sub>

**Figure S36.** <sup>1</sup>H NMR spectrum of 3 $\alpha$ ,27-di-*O-trans*-caffeoylbetulinic acid (**6**) in CD<sub>3</sub>OD at 400 MHz

**Figure S37.** <sup>13</sup>C NMR spectrum of 3 $\alpha$ ,27-di-*O-trans*-caffeoylbetulinic acid (**6**) in CD<sub>3</sub>OD at 100 MHz

**Figure S38.** DEPT spectrum of 3 $\alpha$ ,27-di-*O-trans*-caffeoylbetulinic acid (**6**) in CD<sub>3</sub>OD at 100 MHz

**Figure S39.** COSY spectrum of 3 $\alpha$ ,27-di-*O-trans*-caffeoylbetulinic acid (**6**) in CD<sub>3</sub>OD

**Figure S40.** HSQC spectrum of 3 $\alpha$ ,27-di-*O-trans*-caffeoylbetulinic acid (**6**) in CD<sub>3</sub>OD

**Figure S41.** HMBC spectrum of 3 $\alpha$ ,27-di-*O-trans*-caffeoylbetulinic acid (**6**) in CD<sub>3</sub>OD

**Figure S42.** NOESY spectrum of 3 $\alpha$ ,27-di-*O-trans*-caffeoylbetulinic acid (**6**) in CD<sub>3</sub>OD

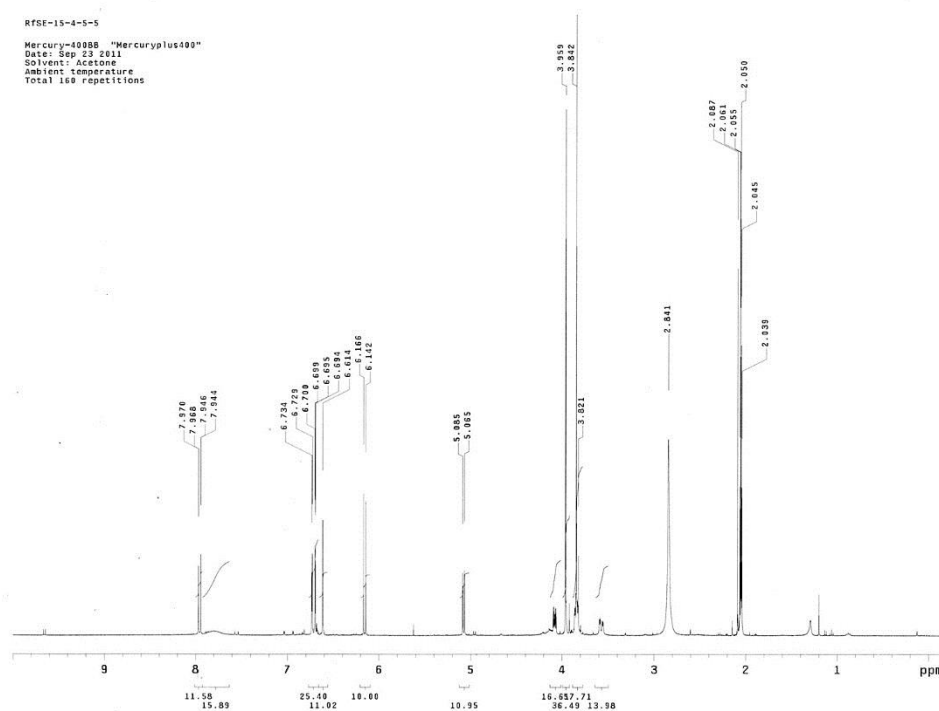

**Figure S1.**  $^1\text{H}$  NMR spectrum of reevesiacoumarin (**1**) in acetone- $d_6$  at 400 MHz

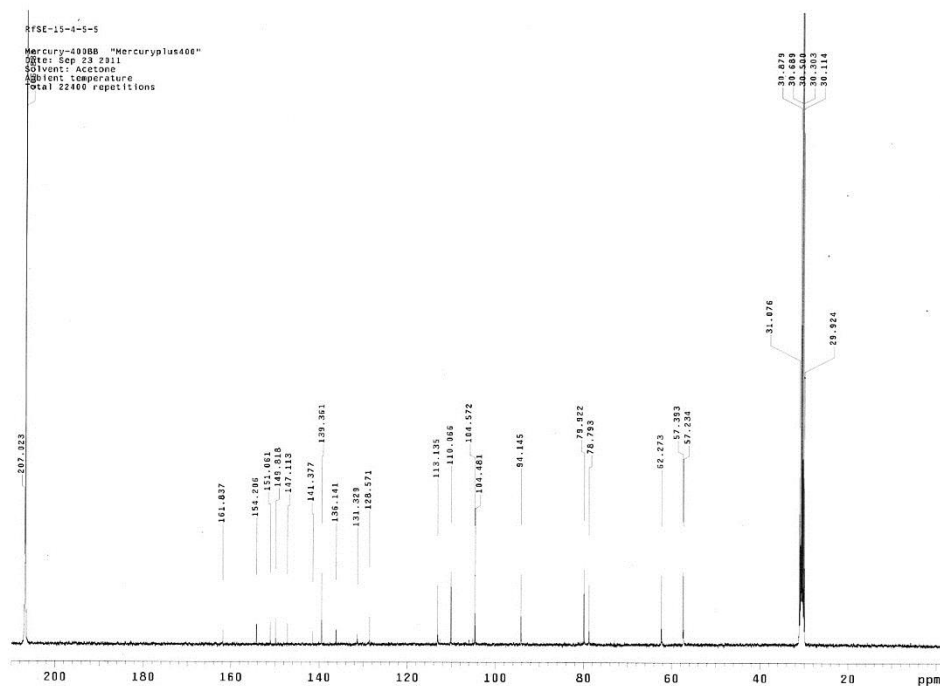

**Figure S2.**  $^{13}\text{C}$  NMR spectrum of reevesiacoumarin (**1**) in acetone- $d_6$  at 100 MHz

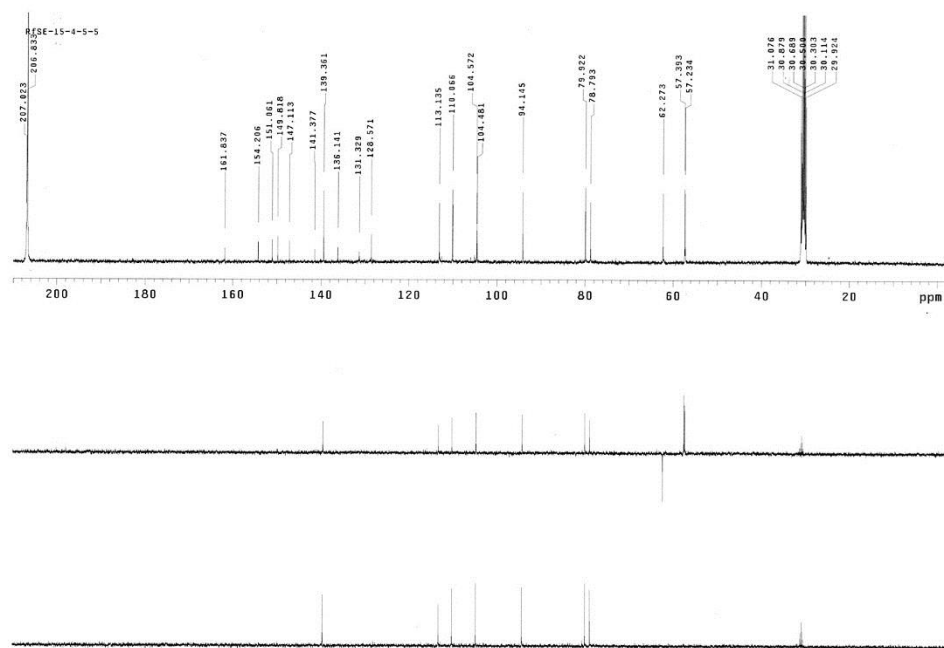

**Figure S3.** DEPT spectrum of reevesiacoumarin (**1**) in acetone- $d_6$  at 100 MHz

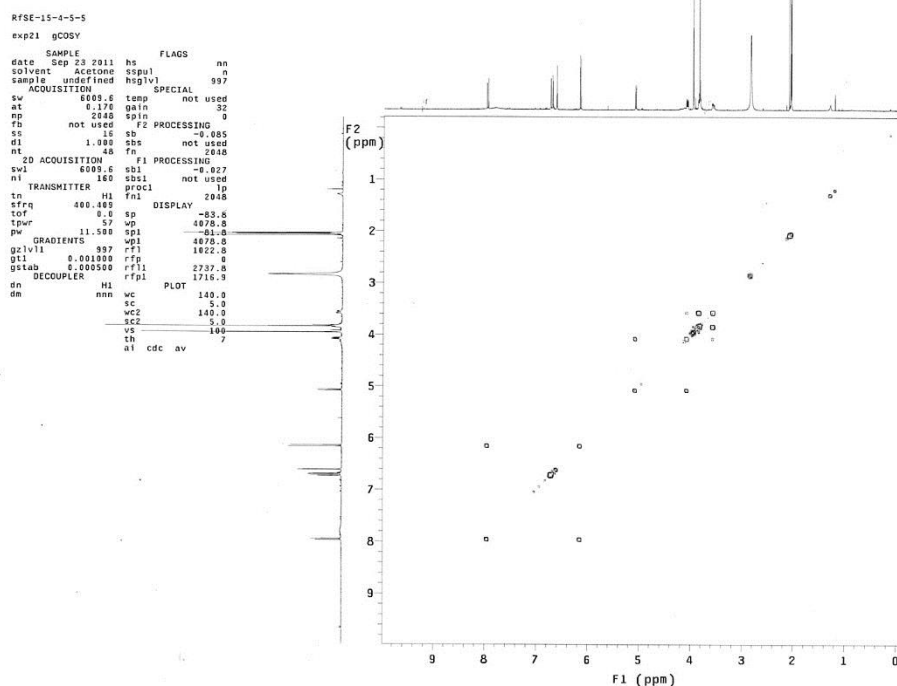

**Figure S4.** COSY spectrum of reevesiacoumarin (**1**) in acetone- $d_6$

RTSE-15-4-5-5

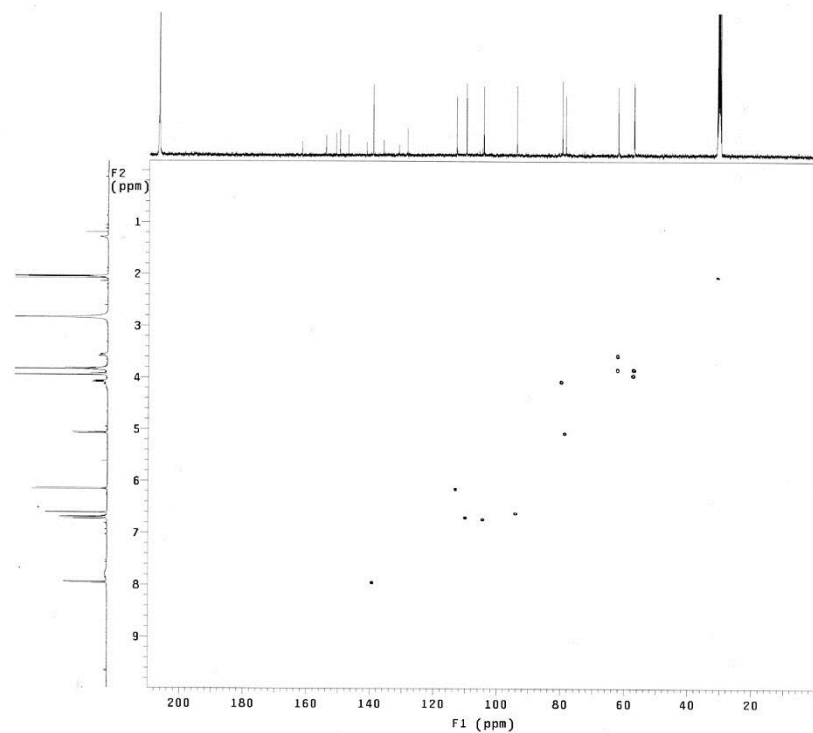

**Figure S5.** HSQC spectrum of reevesiacoumarin (**1**) in acetone- $d_6$

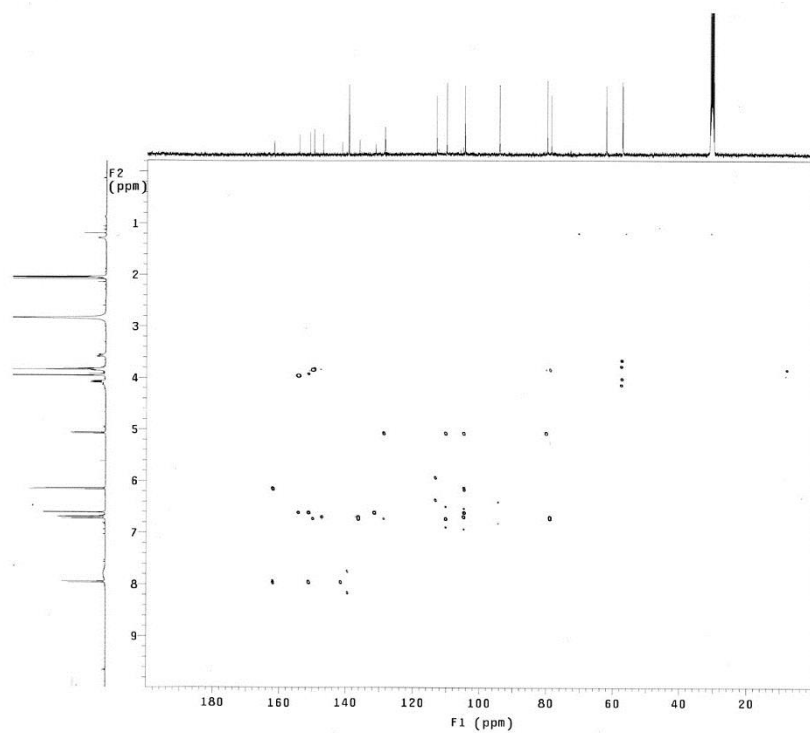

**Figure S6.** HMBC spectrum of reevesiacoumarin (**1**) in acetone- $d_6$

RFSE-15-4-5-5  
exp22 NOESY

```

SAMPLE
date Sep 28 2011 h0 FLAGS n
solvent Acetone s2pul y
sample undefined PFG1g y
ACQUISITION hsg1v1 397
sw 6009.6 SPECIAL
at 0.170 temp not used
mp 2048 gain 32
fd not used spin 3
ss 82 PF2 PROCESSING
d1 1.000 dt 0.079
nt 48 dts not used
2D ACQUISITION f1 PROCESSING 2048
sw1 6009.6 f1 0.022
n1 TRANSMITTER 160 gfl1 not used
tn H1 proc1 1p
rf1 400.400 fml1 2048
tot 8.0 DISPLAY
tpr 57 sp -84.0
pw 11.500 wp -84.9
mix NOESY 0.600 sp1 4078.0
PREGSATURATION rf1 1023.0
satpwr 0 rfl1 2749.8
satp1v 0 rfp1 1716.9
satfrq 0 PLOT
DECOUPLER H1 tc 146.0
dn nnn vc2 146.0
tc2 5.0
vs 100
tn al cdc ph 2

```

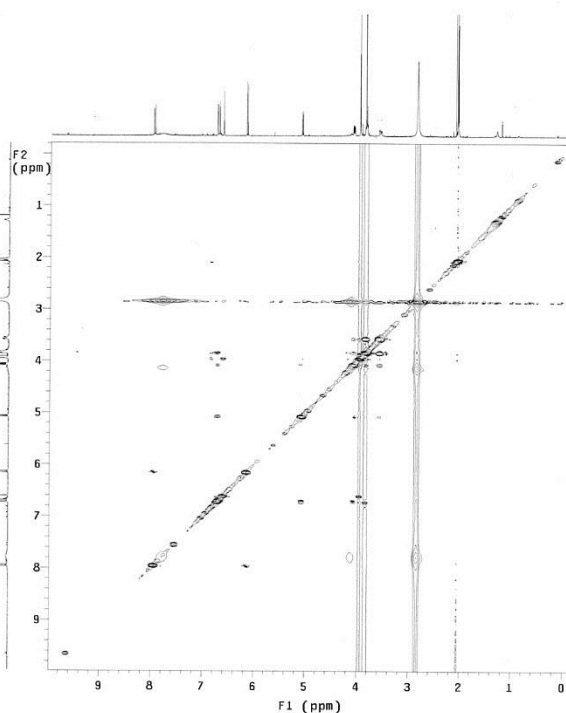

Figure S7. NOESY spectrum of reevesiacoumarin (**1**) in acetone- $d_6$

RFRE-10-7-4-2-A

```

Pulse Sequence: s2pul
UNITYplus-600 "XNUS000"
Date: Jul 18 2012
Solvent: cd3od
Acid temperature
Total 364 repetitions

```

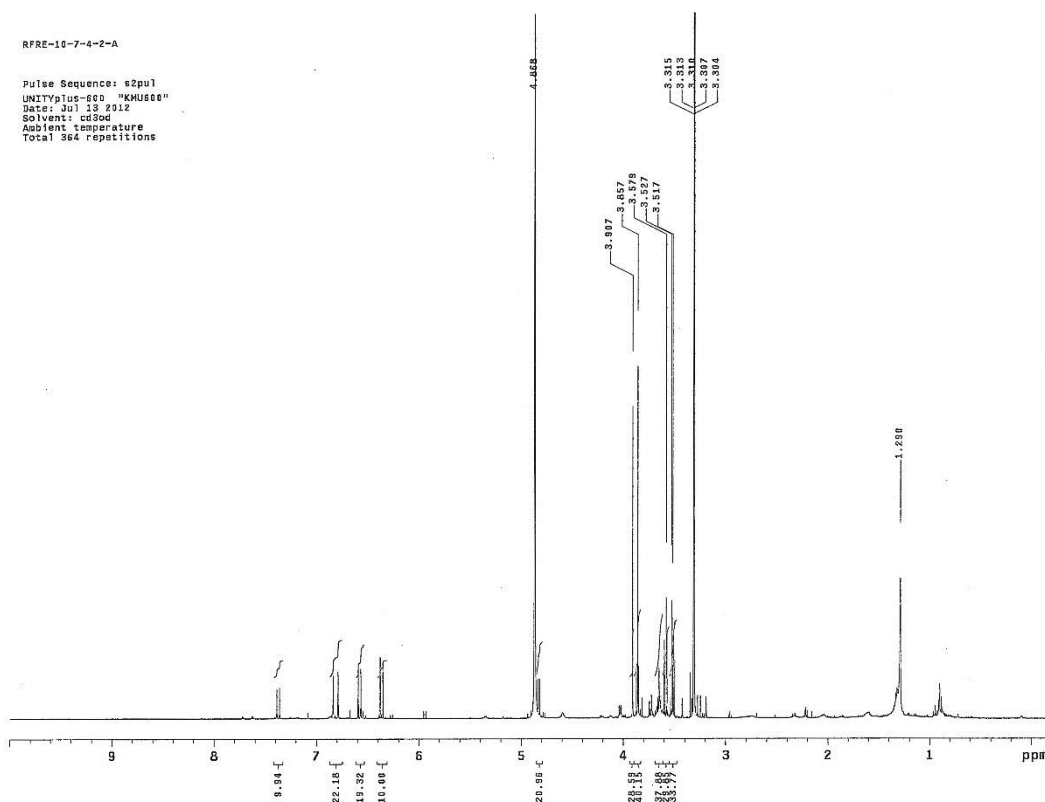

Figure S8.  $^1\text{H}$  NMR spectrum of reevesic acid (**2**) in  $\text{CD}_3\text{OD}$  at 600 MHz



RFRE-10-7-4-2-A  
exp02 0000y

| SAMPLE         |          | DATE |            | HE   |          | FLAG |  | NM |  |
|----------------|----------|------|------------|------|----------|------|--|----|--|
| date           | Jul 13   | 2012 | he         | sepi | not used |      |  |    |  |
| solvent        | cd3od    |      |            | sepi | not used |      |  |    |  |
| sample         | reevesic |      |            | sepi | not used |      |  |    |  |
| ACQUISITION    |          |      |            |      |          |      |  |    |  |
| sv             | 5615.4   | temp | not used   |      |          |      |  |    |  |
| at             | 1.215    | spin | 40         |      |          |      |  |    |  |
| pd             | 4096     | spin | 0          |      |          |      |  |    |  |
| td             | 4096     | f2   | PROCESSING | 0    |          |      |  |    |  |
| ss             | 1.000    | ss   | not used   |      |          |      |  |    |  |
| d1             | 1.000    | ss   | not used   |      |          |      |  |    |  |
| nt             | 48       | f1   | PROCESSING | 4096 |          |      |  |    |  |
| 2D ACQUISITION |          |      |            |      |          |      |  |    |  |
| sw1            | 5615.4   | sb1  | 0.017      |      |          |      |  |    |  |
| ni             | 160      | sbol | not used   |      |          |      |  |    |  |
| PRESATURATION  |          |      |            |      |          |      |  |    |  |
| satmode        | nnn      | fml  | DISPLAY    | 4096 |          |      |  |    |  |
| satpwr         | -15      | wp   | 5000.4     |      |          |      |  |    |  |
| satfrq         | 499.0    | sp   | -120.1     |      |          |      |  |    |  |
| satpwr         | -15      | wp   | 5000.4     |      |          |      |  |    |  |
| TRANSMITTER    |          |      |            |      |          |      |  |    |  |
| tn             | 597.362  | wp1  | -120.1     |      |          |      |  |    |  |
| trfrq          | 597.362  | wp1  | 5000.4     |      |          |      |  |    |  |
| tot            | 597.4    | rfo  | 1223.5     |      |          |      |  |    |  |
| tpwr           | 59       | rfl  | 1223.5     |      |          |      |  |    |  |
| pw             | 10.003   | rfl  | 0          |      |          |      |  |    |  |
| tpwr           | 59       | rfl  | 1223.5     |      |          |      |  |    |  |
| PLOT           |          |      |            |      |          |      |  |    |  |
| gradients      | 711      | wc   | 140.0      |      |          |      |  |    |  |
| g1             | 0.001003 | wc2  | 140.0      |      |          |      |  |    |  |
| g2             | 0.001003 | wc2  | 140.0      |      |          |      |  |    |  |
| g3             | 0.001003 | wc2  | 140.0      |      |          |      |  |    |  |
| g4             | 0.001003 | wc2  | 140.0      |      |          |      |  |    |  |
| g5             | 0.001003 | wc2  | 140.0      |      |          |      |  |    |  |
| g6             | 0.001003 | wc2  | 140.0      |      |          |      |  |    |  |
| g7             | 0.001003 | wc2  | 140.0      |      |          |      |  |    |  |
| g8             | 0.001003 | wc2  | 140.0      |      |          |      |  |    |  |
| g9             | 0.001003 | wc2  | 140.0      |      |          |      |  |    |  |
| g10            | 0.001003 | wc2  | 140.0      |      |          |      |  |    |  |
| g11            | 0.001003 | wc2  | 140.0      |      |          |      |  |    |  |
| g12            | 0.001003 | wc2  | 140.0      |      |          |      |  |    |  |
| g13            | 0.001003 | wc2  | 140.0      |      |          |      |  |    |  |
| g14            | 0.001003 | wc2  | 140.0      |      |          |      |  |    |  |
| g15            | 0.001003 | wc2  | 140.0      |      |          |      |  |    |  |
| g16            | 0.001003 | wc2  | 140.0      |      |          |      |  |    |  |
| g17            | 0.001003 | wc2  | 140.0      |      |          |      |  |    |  |
| g18            | 0.001003 | wc2  | 140.0      |      |          |      |  |    |  |
| g19            | 0.001003 | wc2  | 140.0      |      |          |      |  |    |  |
| g20            | 0.001003 | wc2  | 140.0      |      |          |      |  |    |  |
| g21            | 0.001003 | wc2  | 140.0      |      |          |      |  |    |  |
| g22            | 0.001003 | wc2  | 140.0      |      |          |      |  |    |  |
| g23            | 0.001003 | wc2  | 140.0      |      |          |      |  |    |  |
| g24            | 0.001003 | wc2  | 140.0      |      |          |      |  |    |  |
| g25            | 0.001003 | wc2  | 140.0      |      |          |      |  |    |  |
| g26            | 0.001003 | wc2  | 140.0      |      |          |      |  |    |  |
| g27            | 0.001003 | wc2  | 140.0      |      |          |      |  |    |  |
| g28            | 0.001003 | wc2  | 140.0      |      |          |      |  |    |  |
| g29            | 0.001003 | wc2  | 140.0      |      |          |      |  |    |  |
| g30            | 0.001003 | wc2  | 140.0      |      |          |      |  |    |  |
| g31            | 0.001003 | wc2  | 140.0      |      |          |      |  |    |  |
| g32            | 0.001003 | wc2  | 140.0      |      |          |      |  |    |  |
| g33            | 0.001003 | wc2  | 140.0      |      |          |      |  |    |  |
| g34            | 0.001003 | wc2  | 140.0      |      |          |      |  |    |  |
| g35            | 0.001003 | wc2  | 140.0      |      |          |      |  |    |  |
| g36            | 0.001003 | wc2  | 140.0      |      |          |      |  |    |  |
| g37            | 0.001003 | wc2  | 140.0      |      |          |      |  |    |  |
| g38            | 0.001003 | wc2  | 140.0      |      |          |      |  |    |  |
| g39            | 0.001003 | wc2  | 140.0      |      |          |      |  |    |  |
| g40            | 0.001003 | wc2  | 140.0      |      |          |      |  |    |  |
| g41            | 0.001003 | wc2  | 140.0      |      |          |      |  |    |  |
| g42            | 0.001003 | wc2  | 140.0      |      |          |      |  |    |  |
| g43            | 0.001003 | wc2  | 140.0      |      |          |      |  |    |  |
| g44            | 0.001003 | wc2  | 140.0      |      |          |      |  |    |  |
| g45            | 0.001003 | wc2  | 140.0      |      |          |      |  |    |  |
| g46            | 0.001003 | wc2  | 140.0      |      |          |      |  |    |  |
| g47            | 0.001003 | wc2  | 140.0      |      |          |      |  |    |  |
| g48            | 0.001003 | wc2  | 140.0      |      |          |      |  |    |  |
| g49            | 0.001003 | wc2  | 140.0      |      |          |      |  |    |  |
| g50            | 0.001003 | wc2  | 140.0      |      |          |      |  |    |  |
| g51            | 0.001003 | wc2  | 140.0      |      |          |      |  |    |  |
| g52            | 0.001003 | wc2  | 140.0      |      |          |      |  |    |  |
| g53            | 0.001003 | wc2  | 140.0      |      |          |      |  |    |  |
| g54            | 0.001003 | wc2  | 140.0      |      |          |      |  |    |  |
| g55            | 0.001003 | wc2  | 140.0      |      |          |      |  |    |  |
| g56            | 0.001003 | wc2  | 140.0      |      |          |      |  |    |  |
| g57            | 0.001003 | wc2  | 140.0      |      |          |      |  |    |  |
| g58            | 0.001003 | wc2  | 140.0      |      |          |      |  |    |  |
| g59            | 0.001003 | wc2  | 140.0      |      |          |      |  |    |  |
| g60            | 0.001003 | wc2  | 140.0      |      |          |      |  |    |  |
| g61            | 0.001003 | wc2  | 140.0      |      |          |      |  |    |  |
| g62            | 0.001003 | wc2  | 140.0      |      |          |      |  |    |  |
| g63            | 0.001003 | wc2  | 140.0      |      |          |      |  |    |  |
| g64            | 0.001003 | wc2  | 140.0      |      |          |      |  |    |  |
| g65            | 0.001003 | wc2  | 140.0      |      |          |      |  |    |  |
| g66            | 0.001003 | wc2  | 140.0      |      |          |      |  |    |  |
| g67            | 0.001003 | wc2  | 140.0      |      |          |      |  |    |  |
| g68            | 0.001003 | wc2  | 140.0      |      |          |      |  |    |  |
| g69            | 0.001003 | wc2  | 140.0      |      |          |      |  |    |  |
| g70            | 0.001003 | wc2  | 140.0      |      |          |      |  |    |  |
| g71            | 0.001003 | wc2  | 140.0      |      |          |      |  |    |  |
| g72            | 0.001003 | wc2  | 140.0      |      |          |      |  |    |  |
| g73            | 0.001003 | wc2  | 140.0      |      |          |      |  |    |  |
| g74            | 0.001003 | wc2  | 140.0      |      |          |      |  |    |  |
| g75            | 0.001003 | wc2  | 140.0      |      |          |      |  |    |  |
| g76            | 0.001003 | wc2  | 140.0      |      |          |      |  |    |  |
| g77            | 0.001003 | wc2  | 140.0      |      |          |      |  |    |  |
| g78            | 0.001003 | wc2  | 140.0      |      |          |      |  |    |  |
| g79            | 0.001003 | wc2  | 140.0      |      |          |      |  |    |  |
| g80            | 0.001003 | wc2  | 140.0      |      |          |      |  |    |  |
| g81            | 0.001003 | wc2  | 140.0      |      |          |      |  |    |  |
| g82            | 0.001003 | wc2  | 140.0      |      |          |      |  |    |  |
| g83            | 0.001003 | wc2  | 140.0      |      |          |      |  |    |  |
| g84            | 0.001003 | wc2  | 140.0      |      |          |      |  |    |  |
| g85            | 0.001003 | wc2  | 140.0      |      |          |      |  |    |  |
| g86            | 0.001003 | wc2  | 140.0      |      |          |      |  |    |  |
| g87            | 0.001003 | wc2  | 140.0      |      |          |      |  |    |  |
| g88            | 0.001003 | wc2  | 140.0      |      |          |      |  |    |  |
| g89            | 0.001003 | wc2  | 140.0      |      |          |      |  |    |  |
| g90            | 0.001003 | wc2  | 140.0      |      |          |      |  |    |  |
| g91            | 0.001003 | wc2  | 140.0      |      |          |      |  |    |  |
| g92            | 0.001003 | wc2  | 140.0      |      |          |      |  |    |  |
| g93            | 0.001003 | wc2  | 140.0      |      |          |      |  |    |  |
| g94            | 0.001003 | wc2  | 140.0      |      |          |      |  |    |  |
| g95            | 0.001003 | wc2  | 140.0      |      |          |      |  |    |  |
| g96            | 0.001003 | wc2  | 140.0      |      |          |      |  |    |  |
| g97            | 0.001003 | wc2  | 140.0      |      |          |      |  |    |  |
| g98            | 0.001003 | wc2  | 140.0      |      |          |      |  |    |  |
| g99            | 0.001003 | wc2  | 140.0      |      |          |      |  |    |  |
| g100           | 0.001003 | wc2  | 140.0      |      |          |      |  |    |  |

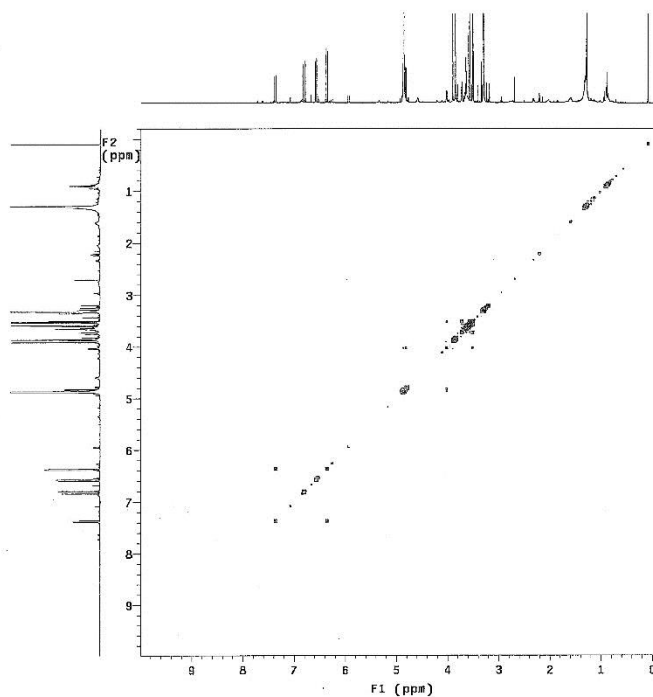

**Figure S11.** COSY spectrum of reevesic acid (**2**) in CD<sub>3</sub>OD

RFRE-10-7-4-2-A

Pulse Sequence: gHSQCAD

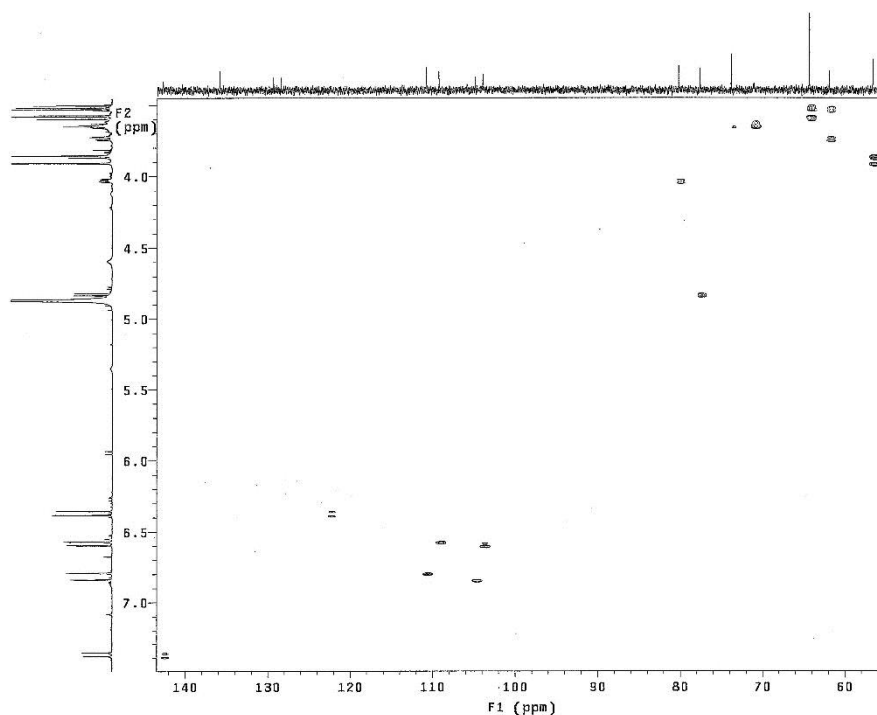

**Figure S12.** HSQC spectrum of reevesic acid (**2**) in CD<sub>3</sub>OD



RFRE-10-7-4-2-A

Pulse Sequence: gHMBC

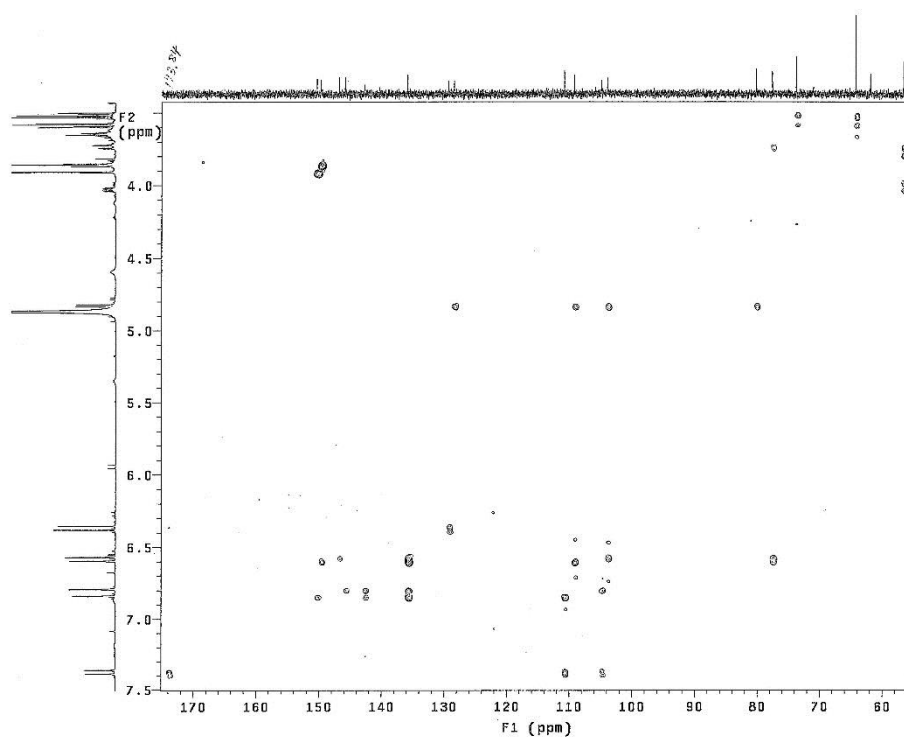

Figure S13. HMBC spectrum of reevesic acid (2) in CD<sub>3</sub>OD

RFRE-10-7-4-2-A

exp43 Noesy

```

SAMPLE          2D DISPLAY      ACQUISITION ARRAYS
date    jul 13 2012    ep1      -120.1    array    phase
solvent    cd3od      wp1      5089.4    arraydim  320
file
ACQUISITION    exp      ec2      140      1      phase
sfrq      587.862    rff1      1223.5    1
tn      0      H1      rfp1      0      2
at      0.213      dfrq      159.220
np      4096      dn      013
sw      9615.4      dpwr      31
fb      4050      dpr      0
hs      32      ddf      0
ss      16      dm      n
tpwr      39      dm      29412
pw      10.6      ddf      0
compht      1.0284      dseq      9.0
dl      1.010      dres      n
mix      0.930      homo      0
tof      587.4      dfrq2      0
nt      48      dn2      0
ct      40      dpwr2      1
gain      0.0025      dn2      n
gt1      711      dm2      29412
gzlv11      0.0020      dm2      1.0
hsq1      5333      dseq2      n
satnode      nnn      dres2      n
satpwr      -13      homo2      0
satdly      0      pf      0.057
scuba      n      pfs      not used
zsf1g      y      wfile      ft
alt_gnd      n      proc      4096
FLADS      n      fn      4096
il      n      math      f
ip      n      sfilter      not used
hs      nn      sorder      3
sspu1      y      sentaps      3
2D ACQUISITION
sw1      9615.4      pf1      0.013
n1      190      dres1      not used
phase      arrayed      wfile1      lp
DISPLAY      -120.1      proc1      lp
wp      5089.4      fn1      4096
vs      2671
ec      5
wc      140
hzmm      43.52
fs      744.68
rff1      1223.5
rfp      0
th      2
ins      100.000
al cdc ph

```

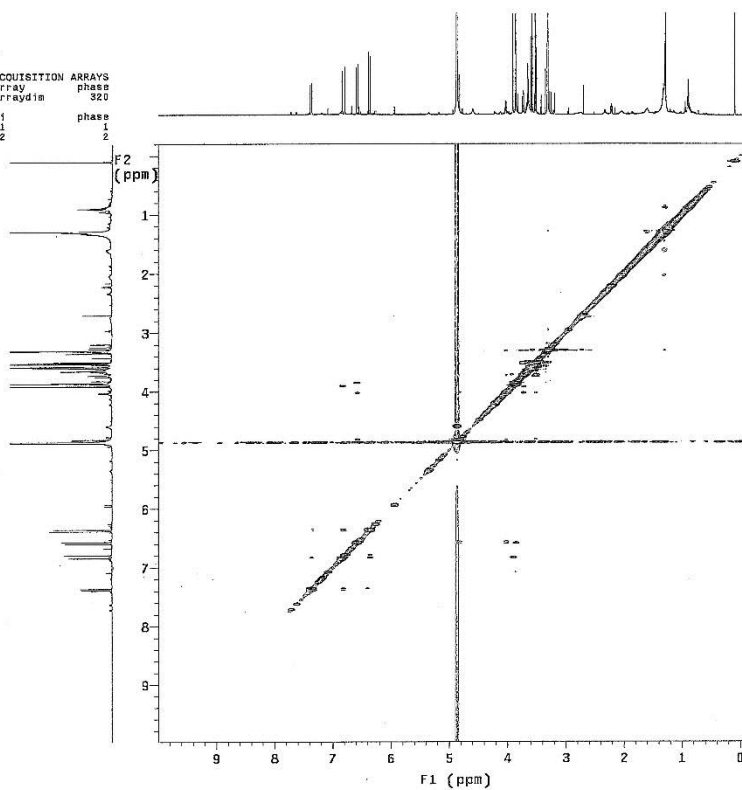

Figure S14. NOESY spectrum of reevesic acid (2) in CD<sub>3</sub>OD



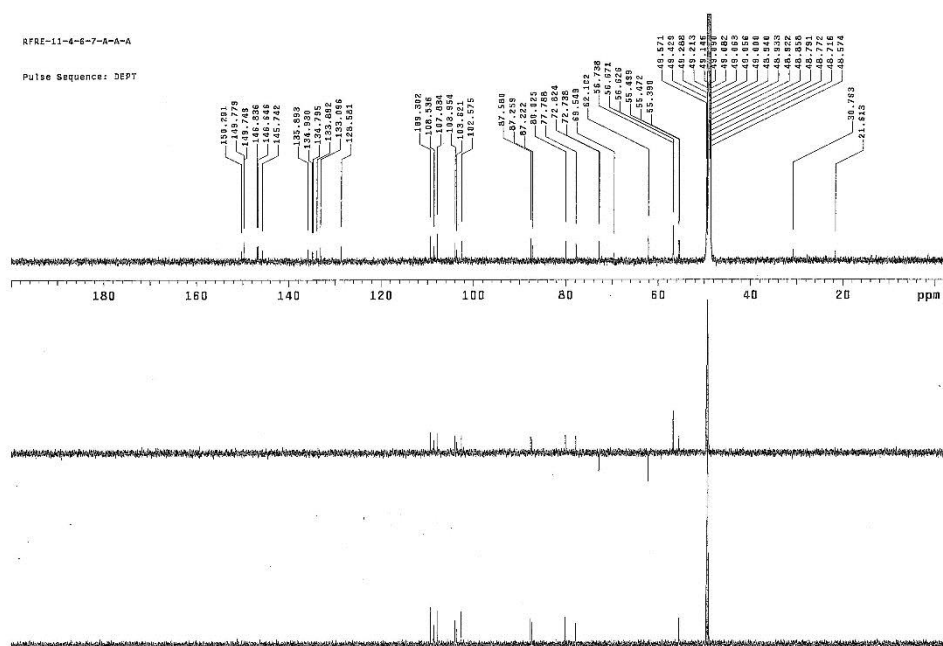

**Figure S17.** DEPT spectrum of reevesilignan (**3**) in CD<sub>3</sub>OD at 150 MHz

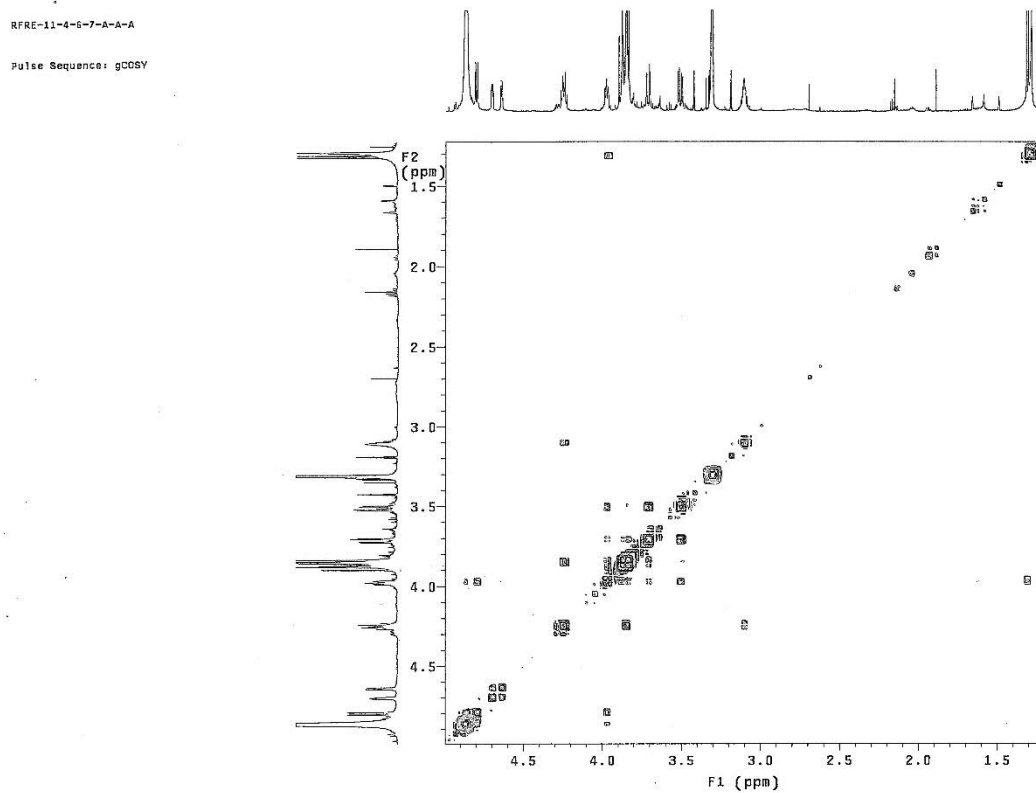

**Figure S18.** COSY spectrum of reevesilignan (**3**) in CD<sub>3</sub>OD

RFRE-11-4-6-7-A-A-A  
Pulse Sequence: gHSQCAD

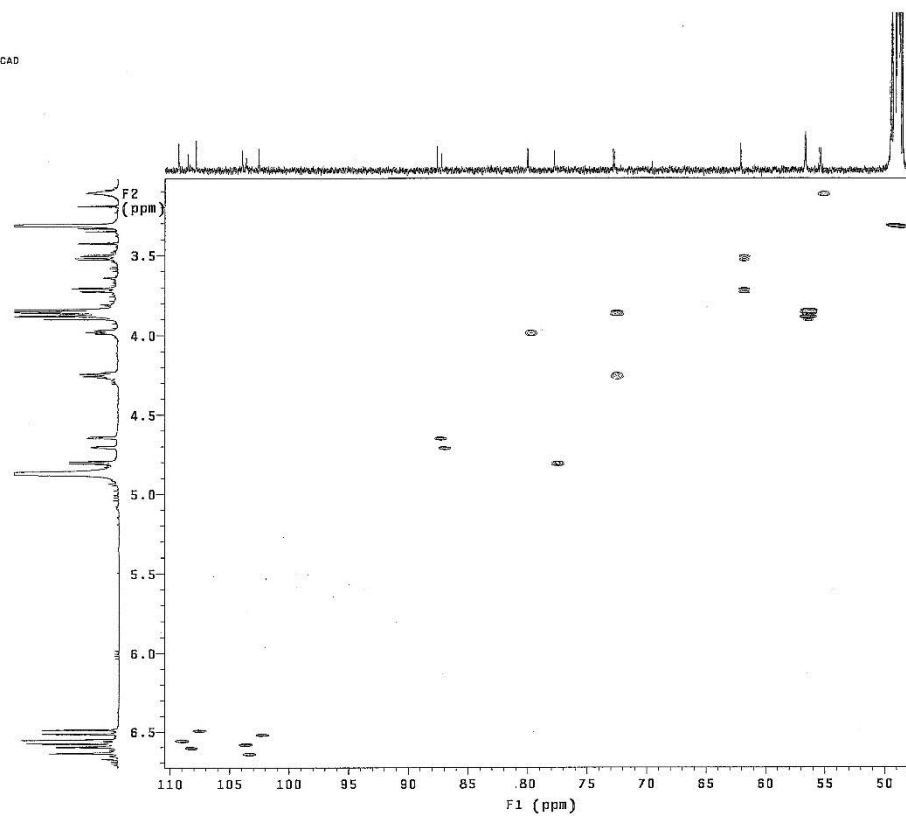

**Figure S19.** HSQC spectrum of reevesilignan (**3**) in CD<sub>3</sub>OD

RFRE-11-4-6-7-A-A-A  
Pulse Sequence: gHMBC

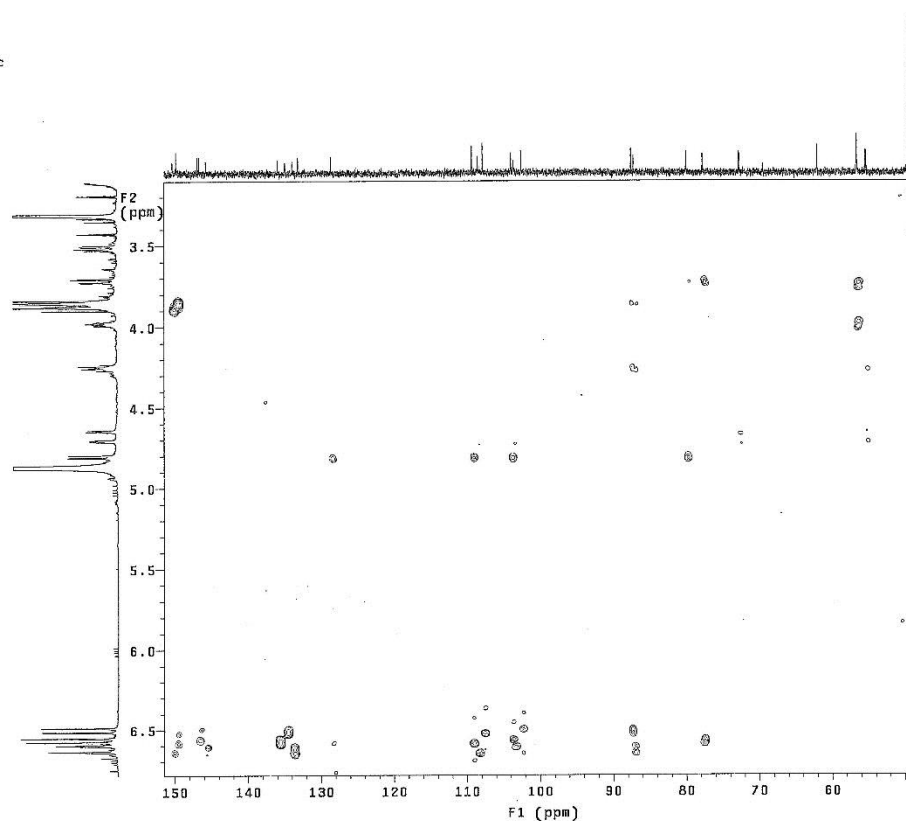

**Figure S20.** HMBC spectrum of reevesilignan (**3**) in CD<sub>3</sub>OD

RFRE-11-4-6-7-A-A-A  
Pulse Sequence: NOESY

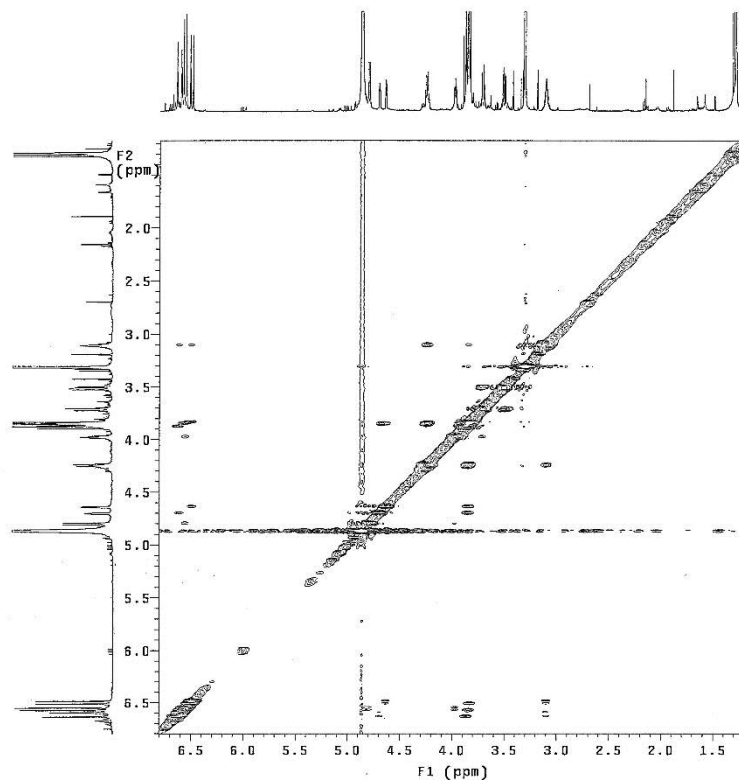

**Figure S21.** NOESY spectrum of reevesilignan (**3**) in CD<sub>3</sub>OD

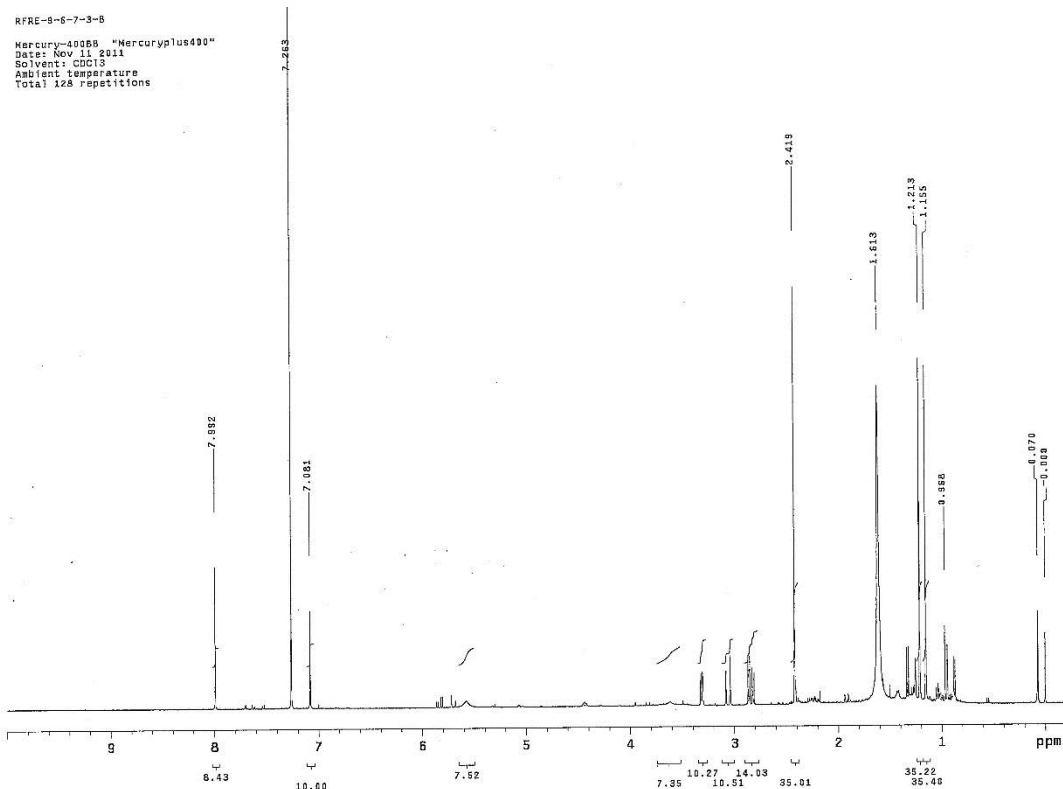

**Figure S22.** <sup>1</sup>H NMR spectrum of reevesiterpenol A (**4**) in CDCl<sub>3</sub> at 400 MHz

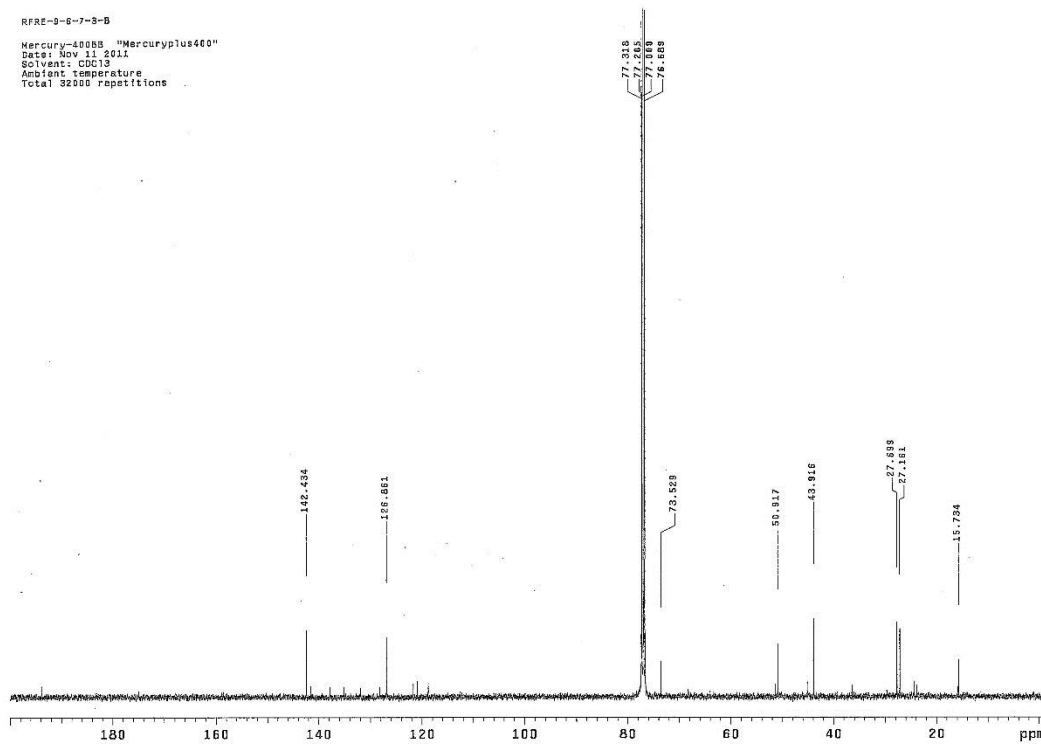

**Figure S23.**  $^{13}\text{C}$  NMR spectrum of reevesiterpenol A (**4**) in  $\text{CDCl}_3$  at 100 MHz

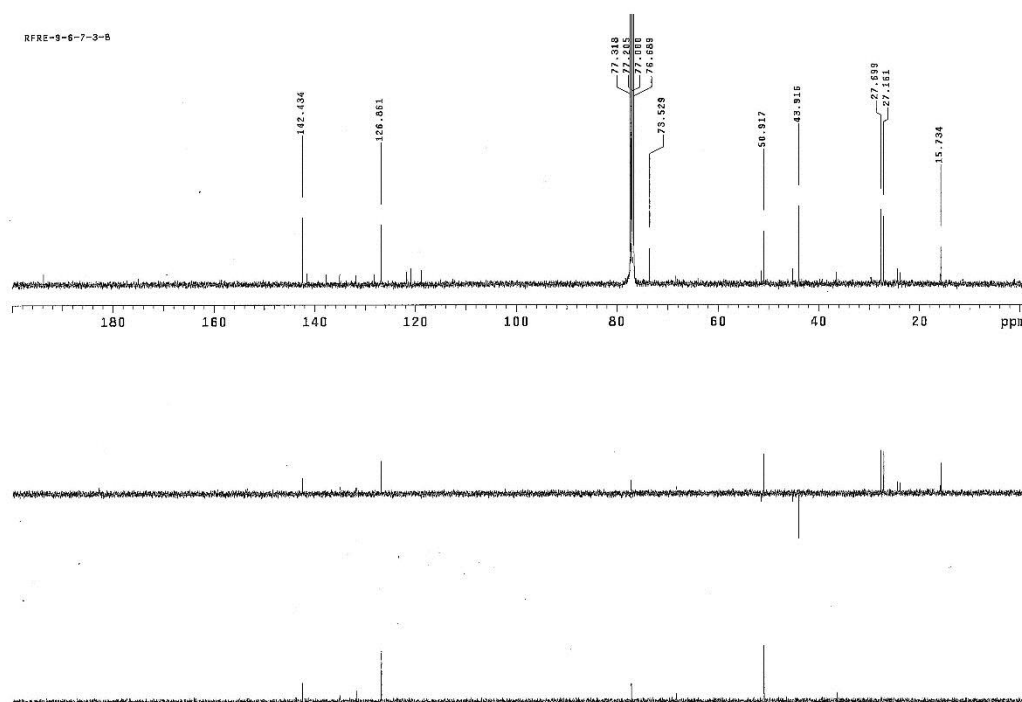

**Figure S24.** DEPT spectrum of reevesiterpenol A (**4**) in  $\text{CDCl}_3$  at 100 MHz

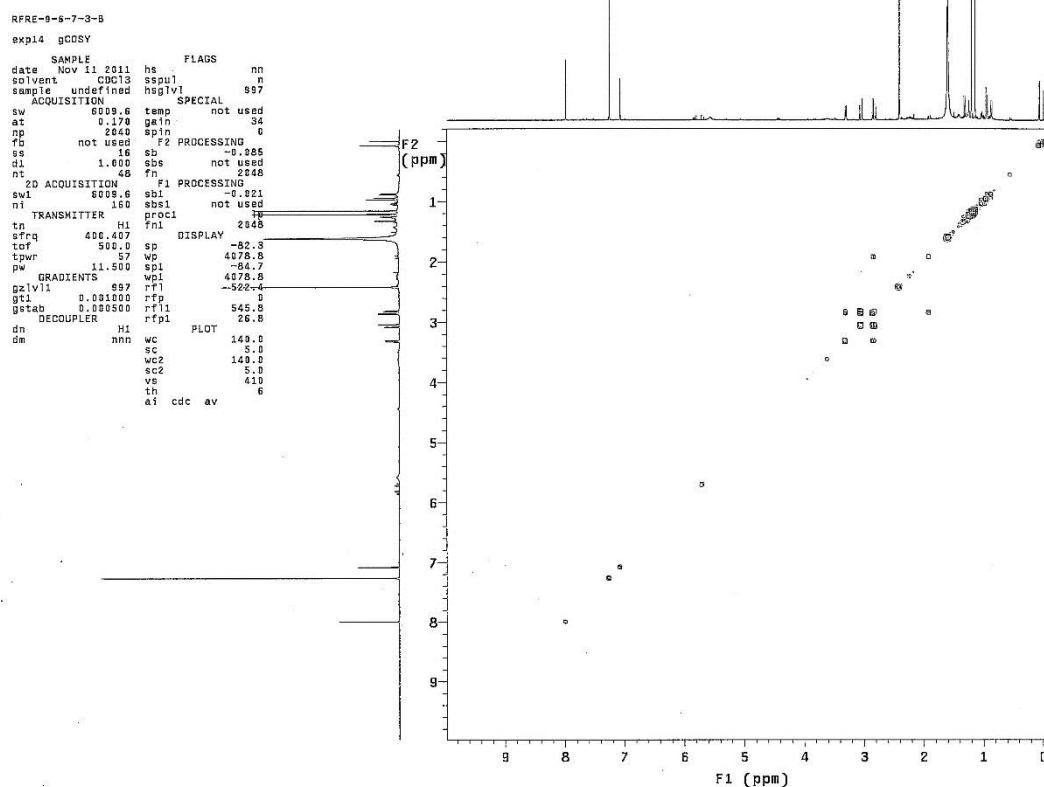

Figure S25. COSY spectrum of reevesiterpenol A (**4**) in CDCl<sub>3</sub>

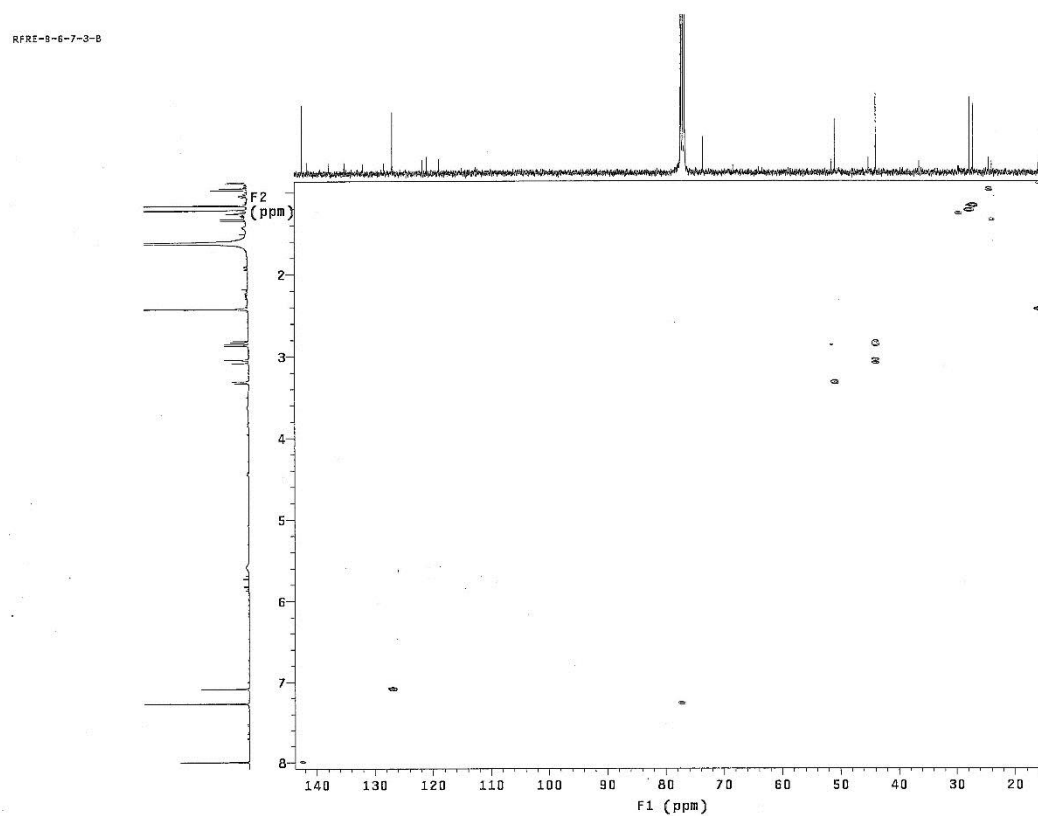

Figure S26. HSQC spectrum of reevesiterpenol A (**4**) in CDCl<sub>3</sub>

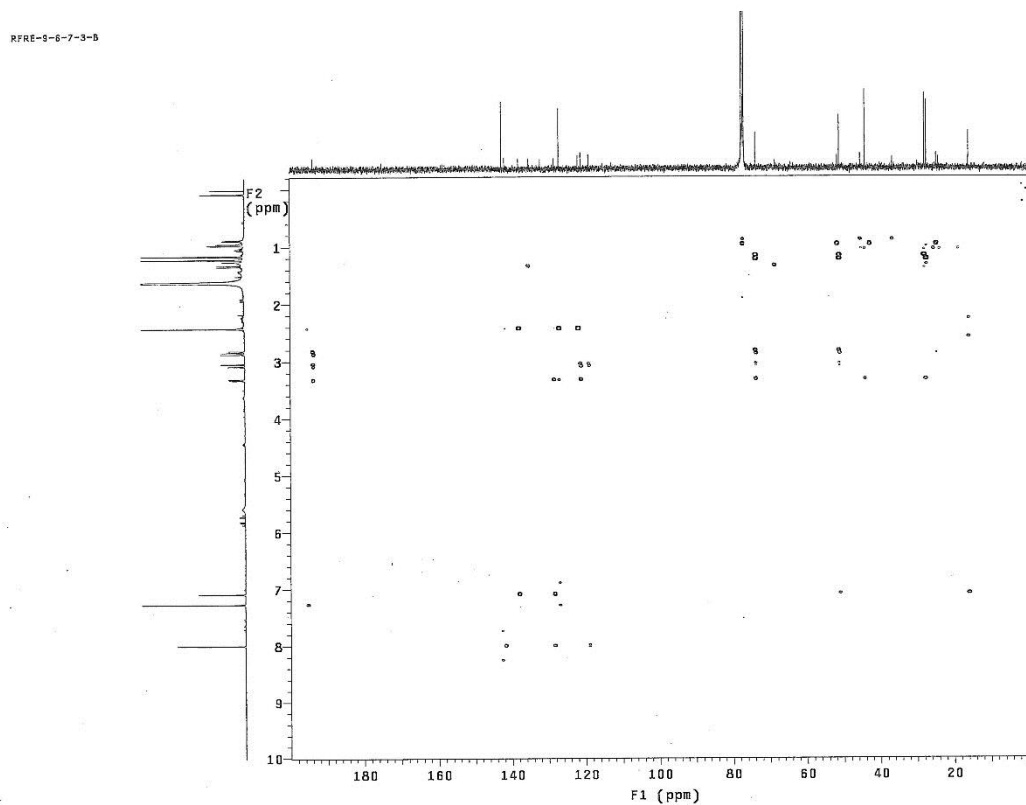

Figure S27. HMBC spectrum of reevesiterpenol A (4) in  $\text{CDCl}_3$

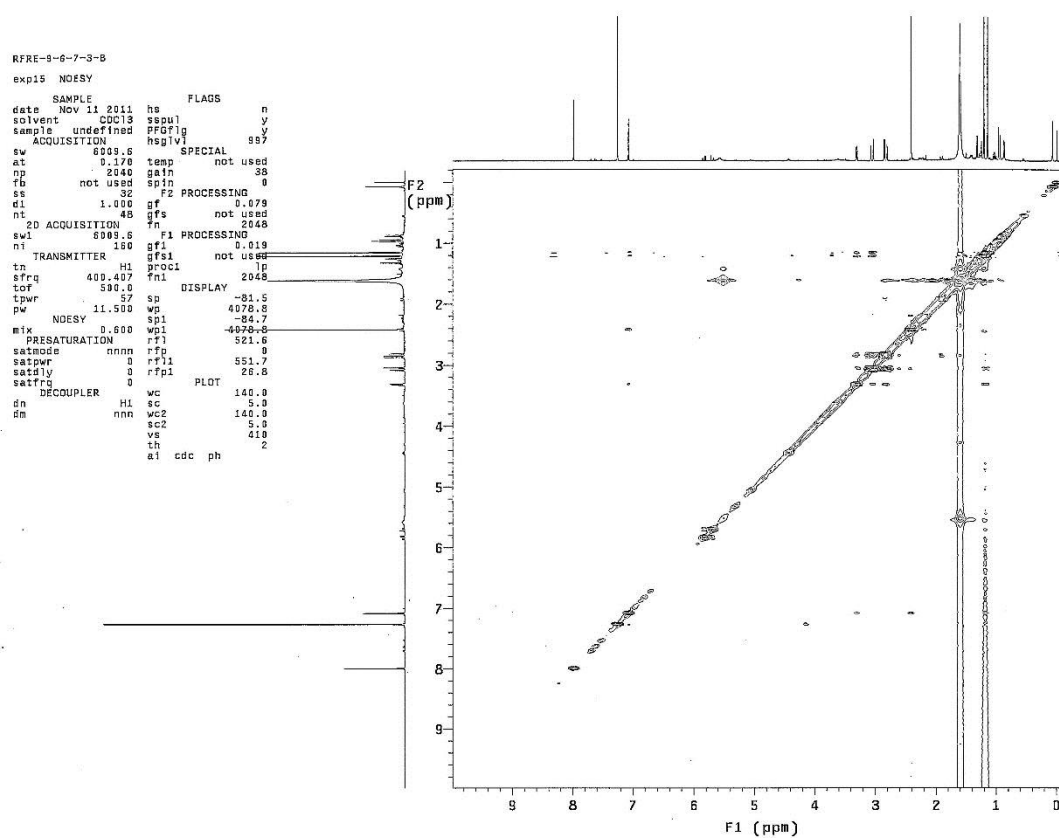

Figure S28. NOESY spectrum of reevesiterpenol A (4) in  $\text{CDCl}_3$



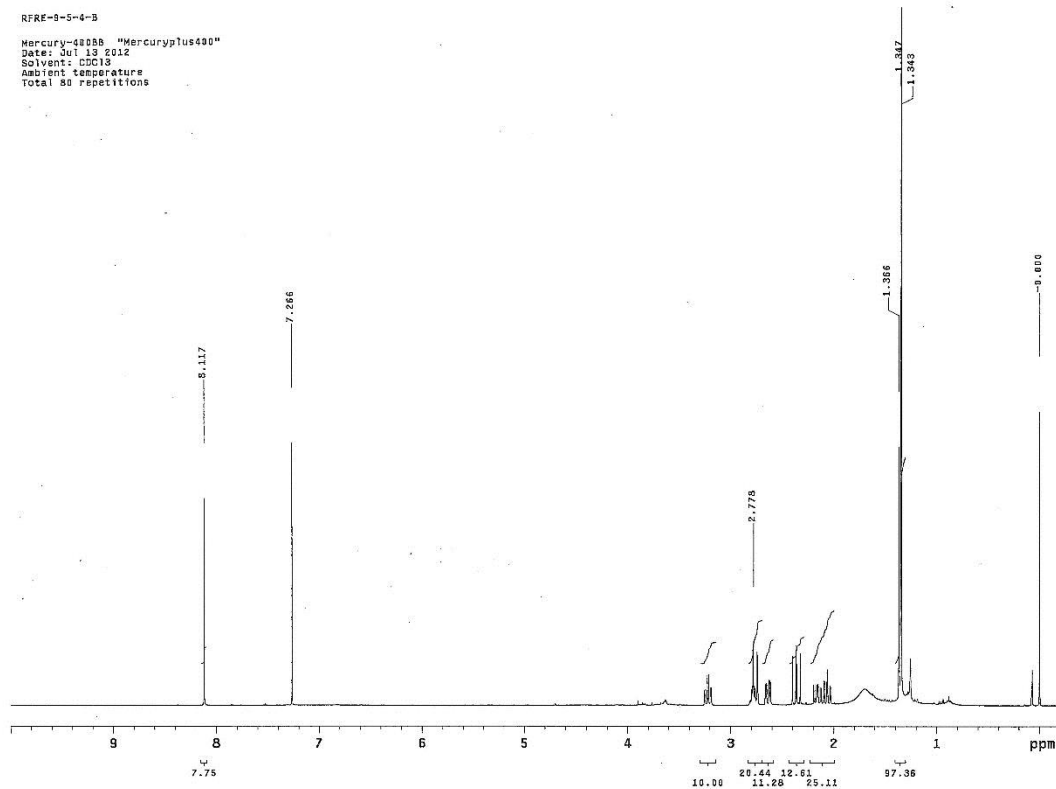

**Figure S29.**  $^1\text{H}$  NMR spectrum of reevesiterpenol B (**5**) in  $\text{CDCl}_3$  at 400 MHz

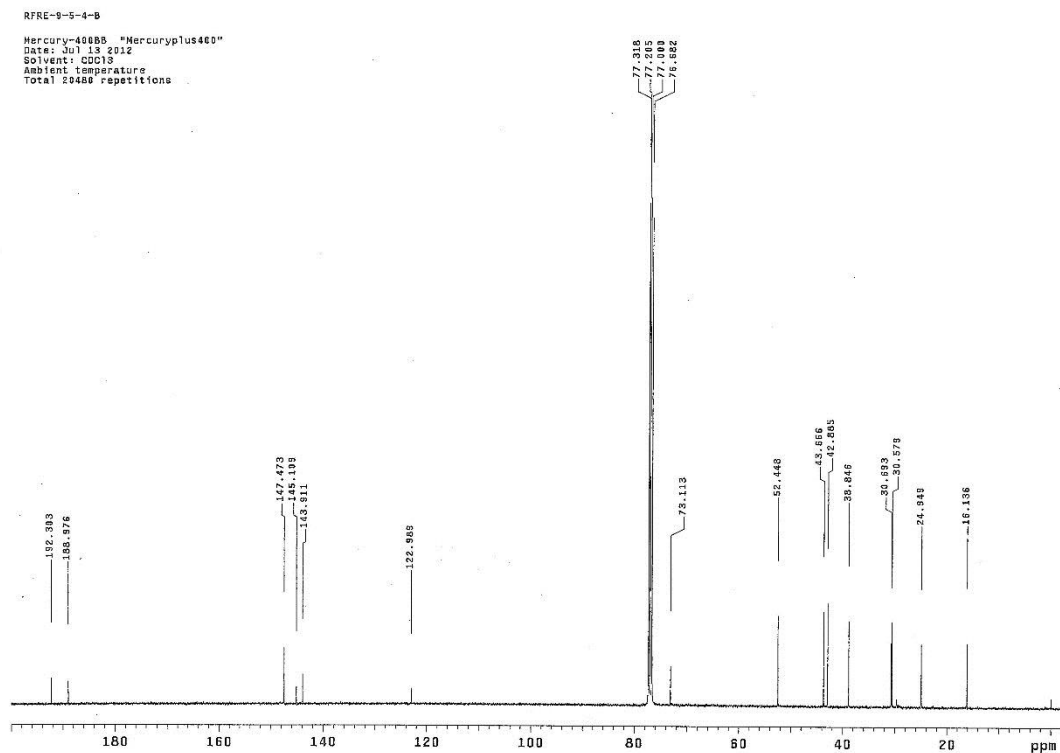

**Figure S30.**  $^{13}\text{C}$  NMR spectrum of reevesiterpenol B (**5**) in  $\text{CDCl}_3$  at 100 MHz

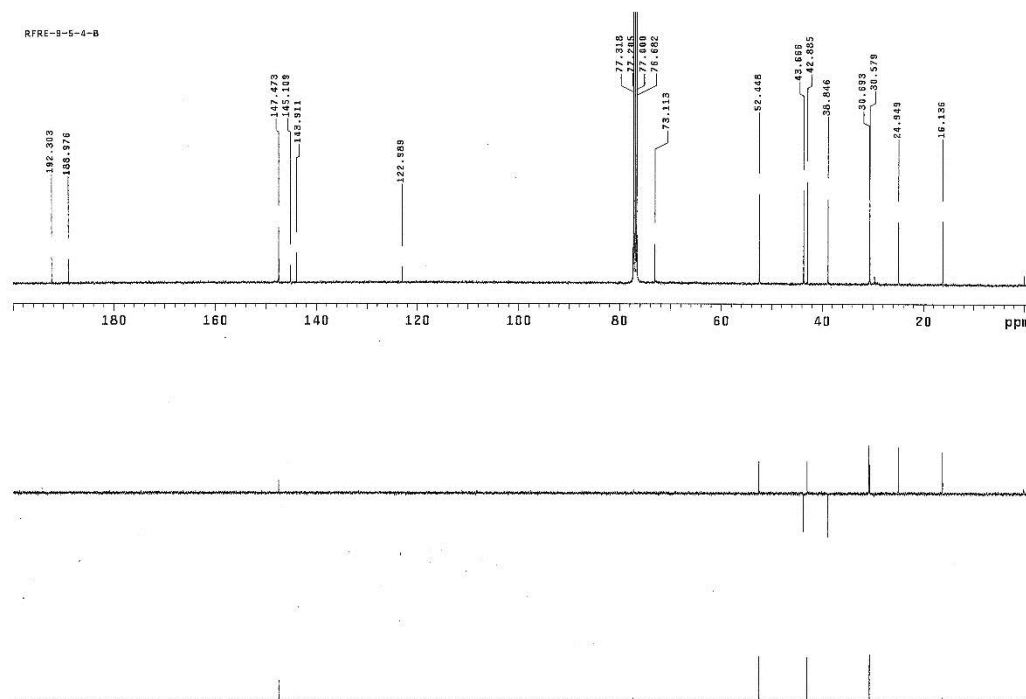

**Figure S31.** DEPT spectrum of reevesiterpenol B (**5**) in  $\text{CDCl}_3$  at 100 MHz

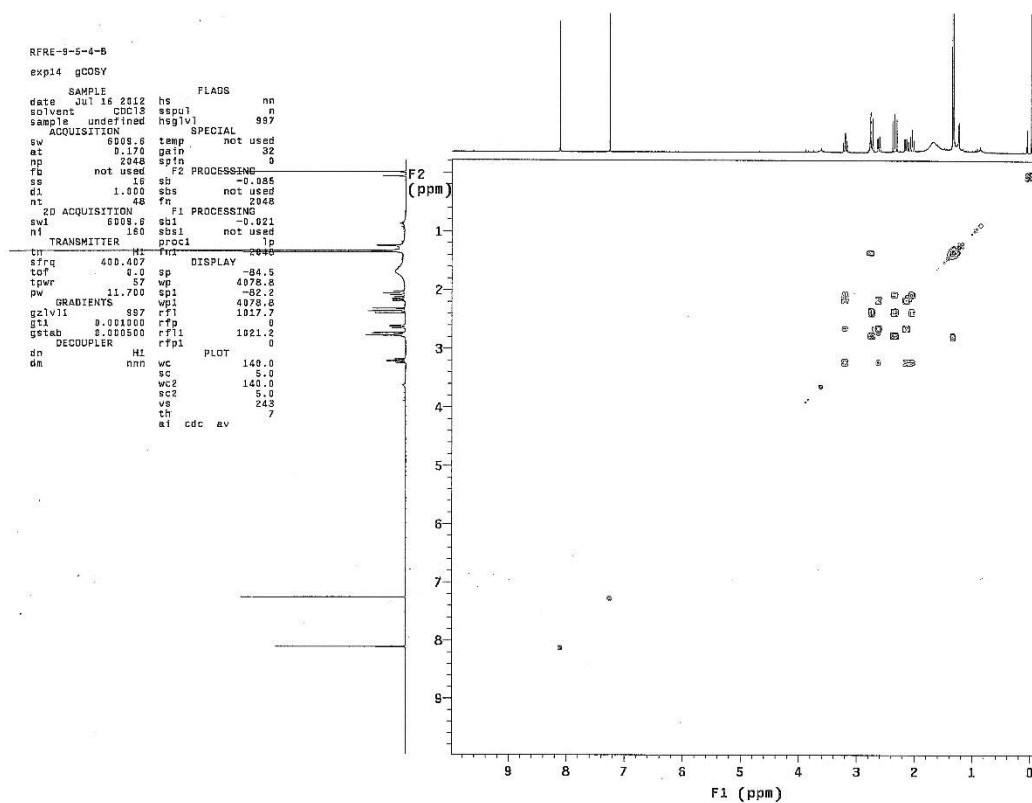

**Figure S32.** COSY spectrum of reevesiterpenol B (**5**) in  $\text{CDCl}_3$

RFRE-9-5-4-B

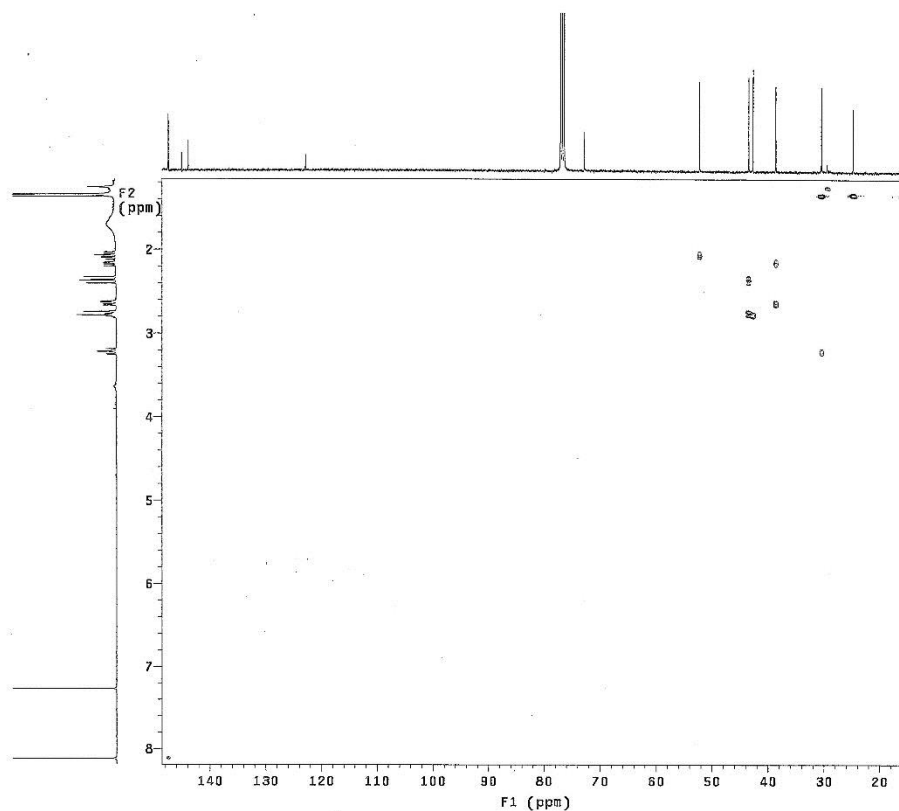

**Figure S33.** HSQC spectrum of reevesiterpenol B (**5**) in  $\text{CDCl}_3$

RFRE-9-5-4-B

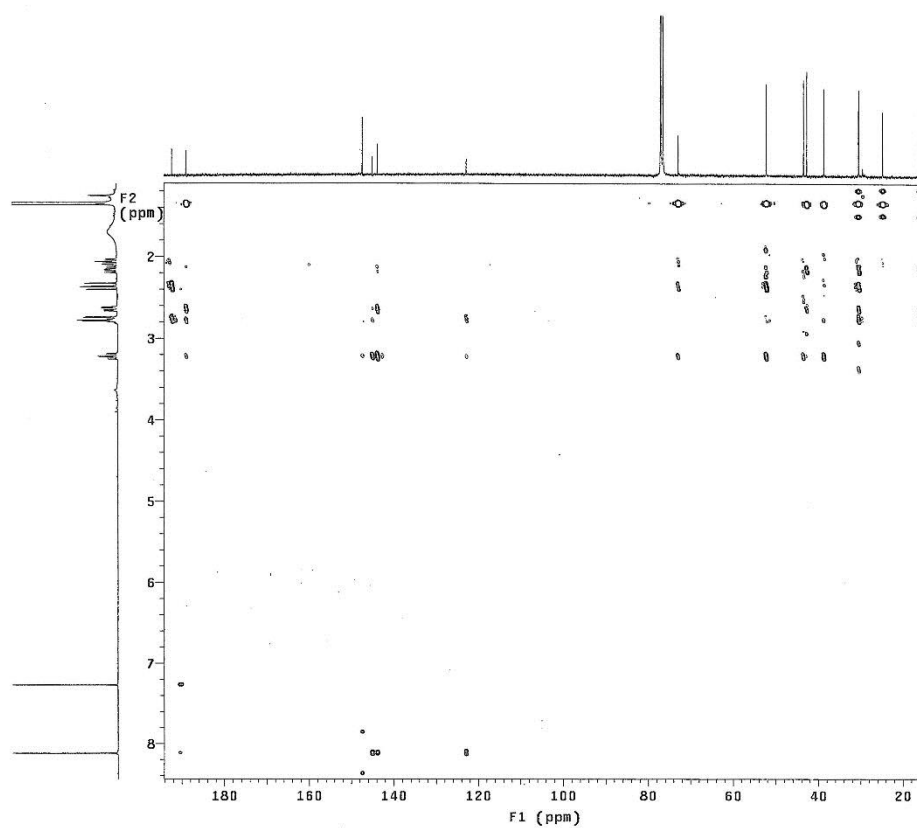

**Figure S34.** HMBC spectrum of reevesiterpenol B (**5**) in  $\text{CDCl}_3$

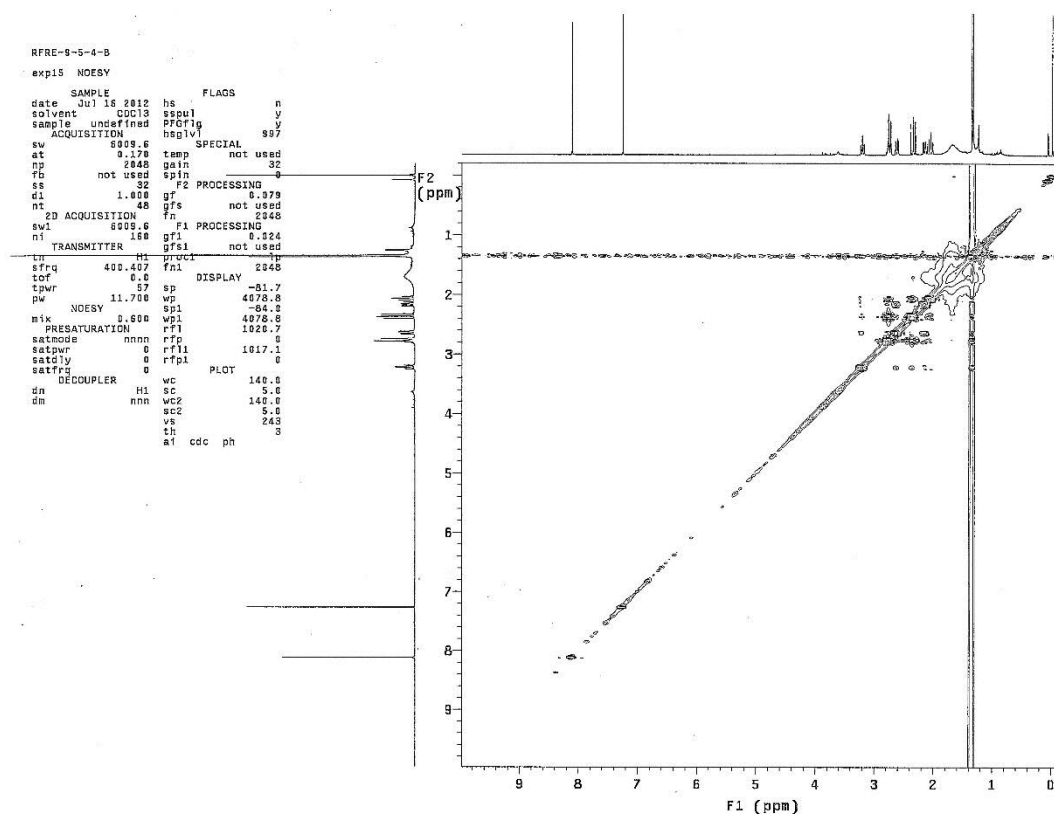

**Figure S35.** NOESY spectrum of reevesiterpenol B (**5**) in  $\text{CDCl}_3$

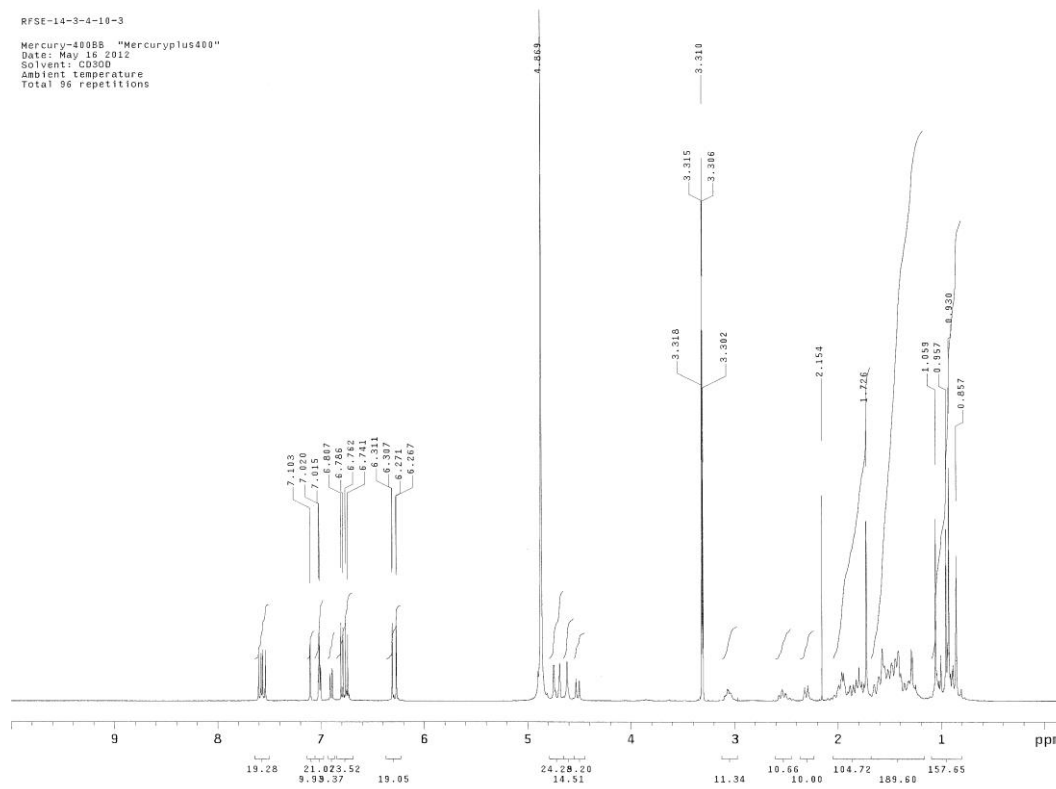

**Figure S36.**  $^1\text{H}$  NMR spectrum of  $3\alpha,27$ -di-*O*-*trans*-caffeoylbetulnic acid (**6**) in  $\text{CD}_3\text{OD}$  at 400 MHz



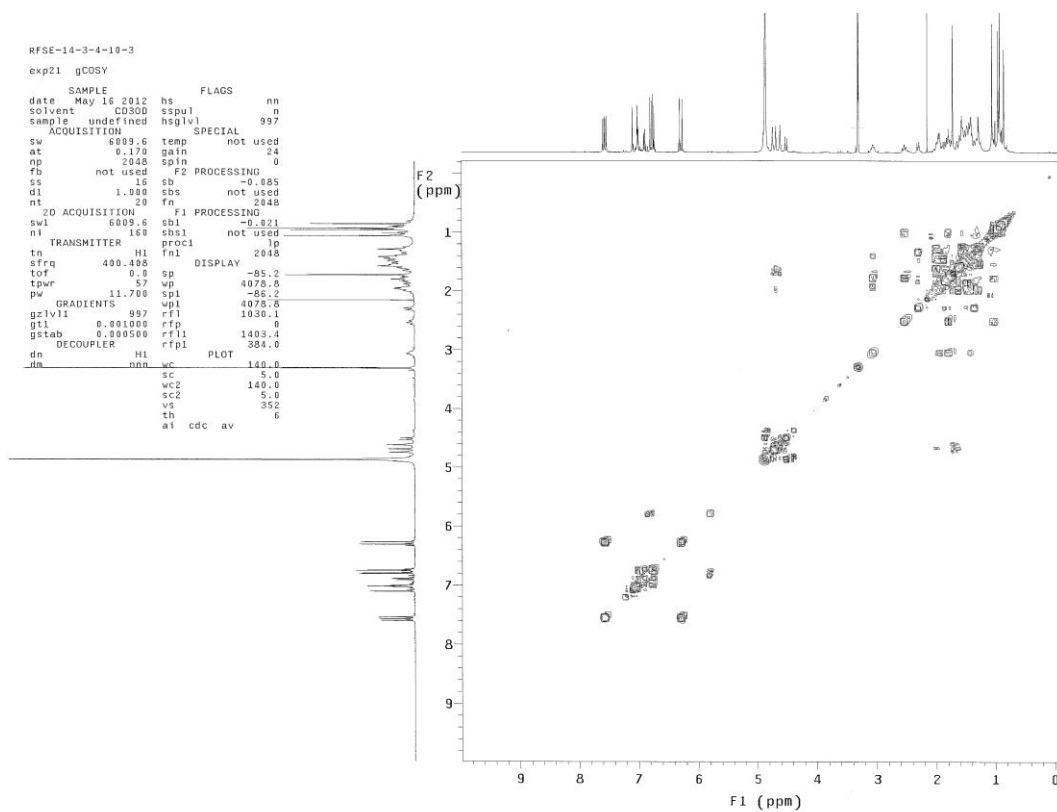

**Figure S39.** COSY spectrum of 3 $\alpha$ ,27-di-*O*-*trans*-caffeoylbetulnic acid (**6**) in CD<sub>3</sub>OD

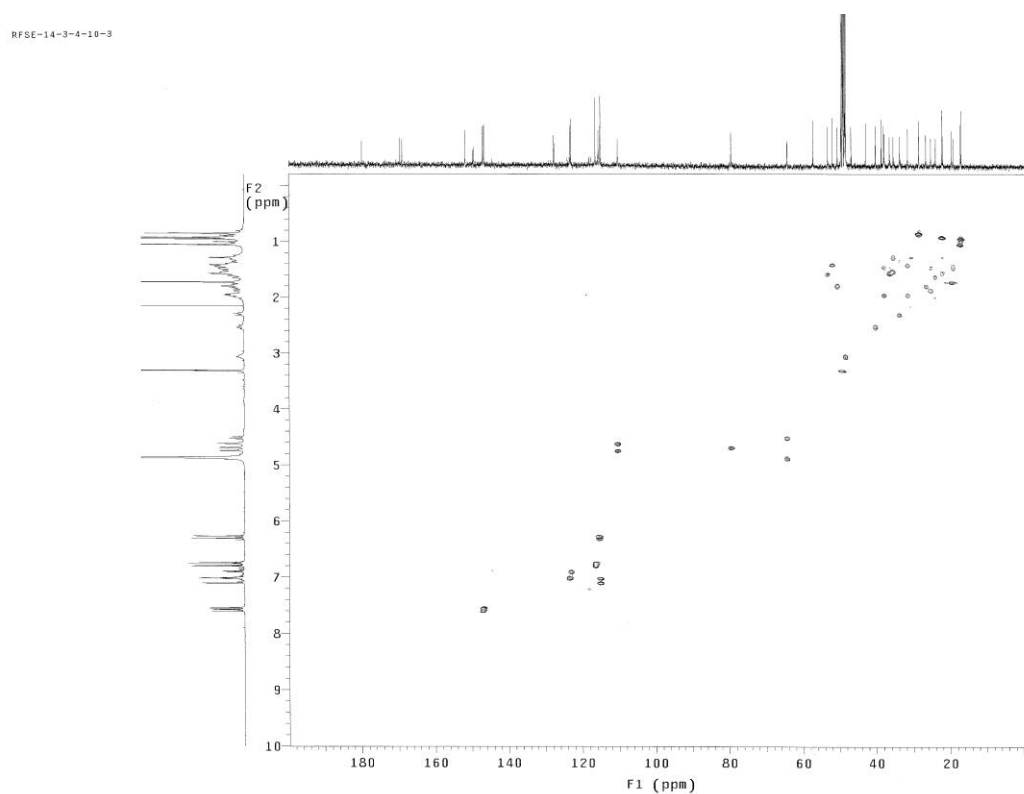

**Figure S40.** HSQC spectrum of 3 $\alpha$ ,27-di-*O*-*trans*-caffeoylbetulnic acid (**6**) in CD<sub>3</sub>OD

RFSE-14-3-4-10-3

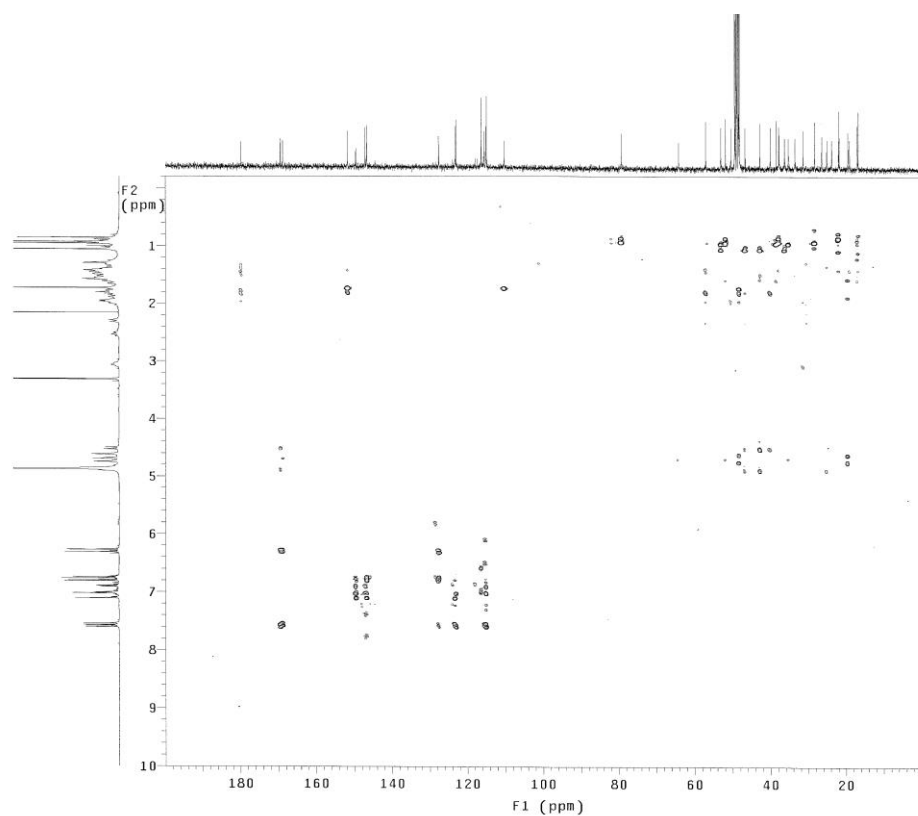

**Figure S41.** HMBC spectrum of 3 $\alpha$ ,27-di-*O*-*trans*-caffeoylbetulinic acid (**6**) in CD<sub>3</sub>OD

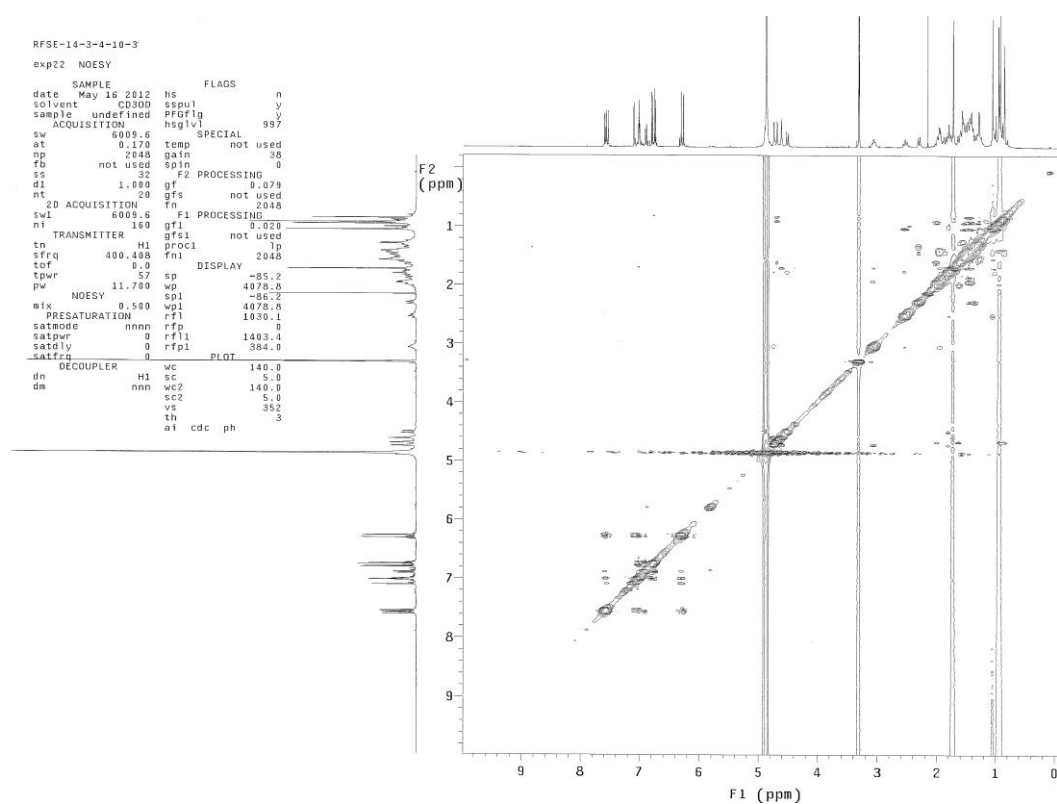

**Figure S42.** NOESY spectrum of 3 $\alpha$ ,27-di-*O*-*trans*-caffeoylbetulinic acid (**6**) in CD<sub>3</sub>OD
